# Supplementary material for: Powerful Sequence Similarity Search Methods and In-Depth Manual Analyses Can Identify Remote Homologs in Many Apparently “Orphan” Viral Proteins
Source: PubMed Central journal article supplement (PMC3911697; doi:10.1128/jvi.02595-13), 2014-01
Supplement: JVI.02595-13_zjv999098468so1.pdf [file JVI.02595-13_zjv999098468so1.pdf]

# 1 Supplemental Material (2 Tables)

## 2 Supplementary Table S1: dataset of viral orphans

3 Dataset of 351 positive-strand, single-stranded (+ssRNA) viral “orphan” proteins for which  
4 BLAST was unable to find homologues in other viral genera. The dataset was adapted from a  
5 larger dataset generously provided by Yanbin Yin (see main text for reference and Materials  
6 and Methods). The protein names and taxonomy listed in the table were taken directly from this  
7 dataset.

| Accession | Description                                                                 | Taxonomy                                                 |
|-----------|-----------------------------------------------------------------------------|----------------------------------------------------------|
| NP_065656 | glycoprotein 2b (GP2b) [Equine arteritis virus]                             | Nidovirales; Arteriviridae; Arterivirus                  |
| NP_065657 | glycoprotein 3 (GP3) [Equine arteritis virus]                               | Nidovirales; Arteriviridae; Arterivirus                  |
| NP_065658 | glycoprotein 4 (GP4) [Equine arteritis virus]                               | Nidovirales; Arteriviridae; Arterivirus                  |
| NP_065659 | glycoprotein 5 (GP5) [Equine arteritis virus]                               | Nidovirales; Arteriviridae; Arterivirus                  |
| NP_065660 | hypothetical protein [Equine arteritis virus]                               | Nidovirales; Arteriviridae; Arterivirus                  |
| NP_065661 | hypothetical protein [Equine arteritis virus]                               | Nidovirales; Arteriviridae; Arterivirus                  |
| NP_068550 | coat protein [Botrytis virus F]                                             | unclassified ssRNA positive-strand viruses               |
| NP_077082 | '8 kDa' triple gene block protein [Clover yellow mosaic virus]              | Flexiviridae; Potexvirus                                 |
| NP_085469 | lysis protein [Bacteriophage AP205]                                         | Leviviridae; Levivirus; unclassified Levivirus           |
| NP_085472 | coat protein [Bacteriophage AP205]                                          | Leviviridae; Levivirus; unclassified Levivirus           |
| NP_112032 | triple gene block protein 4 [Banana mild mosaic virus]                      | Flexiviridae; unassigned species in Flexiviridae         |
| NP_114360 | putative protein P0 [Beet chlorosis virus]                                  | Luteoviridae; Polerovirus                                |
| NP_115455 | putative movement protein [Maize rayado fino virus]                         | Tymoviridae; Marafivirus                                 |
| NP_127508 | envelope (E) protein [Equine arteritis virus]                               | Nidovirales; Arteriviridae; Arterivirus                  |
| NP_148779 | 15 kDa protein [Cactus virus X]                                             | Flexiviridae; Potexvirus                                 |
| NP_148780 | 8 kDa protein [Cactus virus X]                                              | Flexiviridae; Potexvirus                                 |
| NP_150078 | 4.9 kDa non-structural protein [Bovine coronavirus]                         | Nidovirales; Coronaviridae; Coronavirus; Group 2 species |
| NP_150079 | 4.8 kDa non-structural protein [Bovine coronavirus]                         | Nidovirales; Coronaviridae; Coronavirus; Group 2 species |
| NP_203544 | ORF2 [Simian hemorrhagic fever virus]                                       | Nidovirales; Arteriviridae; Arterivirus                  |
| NP_203545 | ORF2a [Simian hemorrhagic fever virus]                                      | Nidovirales; Arteriviridae; Arterivirus                  |
| NP_203546 | ORF3 [Simian hemorrhagic fever virus]                                       | Nidovirales; Arteriviridae; Arterivirus                  |
| NP_203547 | ORF4 [Simian hemorrhagic fever virus]                                       | Nidovirales; Arteriviridae; Arterivirus                  |
| NP_203548 | ORF5 [Simian hemorrhagic fever virus]                                       | Nidovirales; Arteriviridae; Arterivirus                  |
| NP_203549 | ORF6 [Simian hemorrhagic fever virus]                                       | Nidovirales; Arteriviridae; Arterivirus                  |
| NP_203552 | capsid protein [Simian hemorrhagic fever virus]                             | Nidovirales; Arteriviridae; Arterivirus                  |
| NP_203556 | 6.4 kDa triple gene block protein [Indian citrus ringspot virus]            | Flexiviridae; Mandarivirus                               |
| NP_203558 | putative 23 kDa nucleic acid binding protein [Indian citrus ringspot virus] | Flexiviridae; Mandarivirus                               |
| NP_573541 | putative replicase [Euprosterna elaeasa virus]                              | Tetraviridae; Betatetravirus                             |
| NP_597749 | Charged protein [Tobacco mosaic virus]                                      | Tobamovirus                                              |
| NP_604482 | gamma B protein [Barley stripe mosaic virus]                                | Hordeivirus                                              |
| NP_608313 | 7 kDa protein [Tobacco necrosis virus D]                                    | Tombusviridae; Necrovirus                                |
| NP_608315 | 7 kDa protein [Tobacco necrosis virus D]                                    | Tombusviridae; Necrovirus                                |
| NP_612591 | 8kDa protein [beet soil-borne mosaic virus]                                 | Benyvirus                                                |
| NP_613256 | p11K protein [Carnation ringspot virus]                                     | Tombusviridae; Dianthovirus                              |
| NP_613284 | hypothetical protein [Cowpea mosaic virus]                                  | Comoviridae; Comovirus                                   |
| NP_613269 | movement protein [Cowpea mottle virus]                                      | Tombusviridae; Carmovirus                                |
| NP_613270 | movement protein [Cowpea mottle virus]                                      | Tombusviridae; Carmovirus                                |
| NP_613272 | hypothetical protein [Cowpea mottle virus]                                  | Tombusviridae; Carmovirus                                |
| NP_619562 | TGB3 protein [Shallot latent virus]                                         | Flexiviridae; Carlavirus                                 |
| NP_619694 | hypothetical protein [Lettuce infectious yellows virus]                     | Closteroviridae; Crinivirus                              |
| NP_619699 | unknown [Lettuce infectious yellows virus]                                  | Closteroviridae; Crinivirus                              |
| NP_619663 | unknown [Grapevine virus A]                                                 | Flexiviridae; Vitivirus                                  |
| NP_619666 | putative RNA binding protein [Grapevine virus A]                            | Flexiviridae; Vitivirus                                  |
| NP_619655 | ORF2 [Grapevine virus B]                                                    | Flexiviridae; Vitivirus                                  |
| NP_619673 | hypothetical protein [Hibiscus chlorotic ringspot virus]                    | Tombusviridae; Carmovirus                                |
| NP_619674 | putative movement protein P8 [Hibiscus chlorotic ringspot virus]            | Tombusviridae; Carmovirus                                |

|           |                                                                  |                                                            |
|-----------|------------------------------------------------------------------|------------------------------------------------------------|
| NP_619675 | putative movement protein P9 [Hibiscus chlorotic ringspot virus] | Tombusviridae; Carmovirus                                  |
| NP_619677 | hypothetical protein [Hibiscus chlorotic ringspot virus]         | Tombusviridae; Carmovirus                                  |
| NP_619717 | hypothetical protein [Maize chlorotic mottle virus]              | Tombusviridae; Machlomovirus                               |
| NP_619746 | 8 kDa protein [Potato aucuba mosaic virus]                       | Flexiviridae; Potexvirus                                   |
| NP_619749 | 8 kDa protein [Potato aucuba mosaic virus]                       | Flexiviridae; Potexvirus                                   |
| NP_619773 | coat protein [Pelargonium zonate spot virus]                     | Bromoviridae                                               |
| NP_619754 | hypothetical protein [Oat chlorotic stunt virus]                 | Tombusviridae; Avenavirus                                  |
| NP_619735 | hypothetical 34K protein [Pea enation mosaic virus-1]            | Luteoviridae; Enamovirus                                   |
| NP_620039 | capsid protein [Olive latent virus 2]                            | Bromoviridae; Oleavirus                                    |
| NP_620110 | protein B2 [Pariacoto virus]                                     | Nodaviridae; Alphanodavirus                                |
| NP_620441 | cysteine rich protein [Potato mop-top virus]                     | Pomovirus                                                  |
| NP_620466 | movement protein [Raspberry bushy dwarf virus]                   | Idaeovirus                                                 |
| NP_620467 | coat protein [Raspberry bushy dwarf virus]                       | Idaeovirus                                                 |
| NP_620503 | P1 [Ryegrass mottle virus]                                       | Sobemovirus                                                |
| NP_620558 | protein P2 [Acyrtosiphon pisum virus]                            | unclassified ssRNA positive-strand viruses                 |
| NP_620645 | 8K triple gene block protein [Strawberry mild yellow edge virus] | Flexiviridae; Potexvirus                                   |
| NP_620647 | 11K hypothetical protein [Strawberry mild yellow edge virus]     | Flexiviridae; Potexvirus                                   |
| NP_620683 | hypothetical protein TRVs2gp2 [Tobacco rattle virus]             | Tobravirus                                                 |
| NP_620684 | hypothetical protein TRVs2gp3 [Tobacco rattle virus]             | Tobravirus                                                 |
| NP_620722 | P8 protein [Turnip crinkle virus]                                | Tombusviridae; Carmovirus                                  |
| NP_620718 | triple gene block protein 3 [White clover mosaic virus]          | Flexiviridae; Potexvirus                                   |
| NP_620839 | 13K triple gene block protein [Plantago asiatica mosaic virus]   | Flexiviridae; Potexvirus                                   |
| NP_624334 | movement protein [Citrus leaf blotch virus]                      | Flexiviridae; unassigned species in Flexiviridae           |
| NP_624316 | movement protein 3 [Sugarcane striate mosaic associated virus]   | Flexiviridae; unassigned species in Flexiviridae           |
| NP_660173 | ORF 4 [Beet western yellows ST9 associated virus]                | unclassified ssRNA positive-strand viruses                 |
| NP_663727 | TGB3 protein [Pepino mosaic virus]                               | Flexiviridae; Potexvirus                                   |
| NP_689397 | putative ribonuclease III [Sweet potato chlorotic stunt virus]   | Closteroviridae; Crinivirus                                |
| NP_689398 | putative membrane protein [Sweet potato chlorotic stunt virus]   | Closteroviridae; Crinivirus                                |
| NP_689399 | hypothetical protein [Sweet potato chlorotic stunt virus]        | Closteroviridae; Crinivirus                                |
| NP_689400 | p6 protein [Sweet potato chlorotic stunt virus]                  | Closteroviridae; Crinivirus                                |
| NP_689403 | hypothetical protein [Sweet potato chlorotic stunt virus]        | Closteroviridae; Crinivirus                                |
| NP_702991 | triple gene block3 [Tulip virus X]                               | Flexiviridae; Potexvirus                                   |
| NP_715626 | hypothetical protein SCMoVgp1 [Subterranean clover mottle virus] | Sobemovirus                                                |
| NP_740767 | 6KDa glycine-rich protein [Broad bean necrosis virus]            | Pomovirus                                                  |
| NP_778214 | unknown [Turnip rosette virus]                                   | Sobemovirus                                                |
| NP_778215 | unknown [Turnip rosette virus]                                   | Sobemovirus                                                |
| NP_783208 | coat protein [Oyster mushroom spherical virus]                   | unclassified ssRNA positive-strand viruses                 |
| NP_783204 | 12 kDa unknown protein [Oyster mushroom spherical virus]         | unclassified ssRNA positive-strand viruses                 |
| NP_783205 | 12.5 kDa unknown protein [Oyster mushroom spherical virus]       | unclassified ssRNA positive-strand viruses                 |
| NP_783206 | 21 kDa unknown protein [Oyster mushroom spherical virus]         | unclassified ssRNA positive-strand viruses                 |
| NP_783207 | 14.5 kDa unknown protein [Oyster mushroom spherical virus]       | unclassified ssRNA positive-strand viruses                 |
| NP_783209 | 23 kDa unknown protein [Oyster mushroom spherical virus]         | unclassified ssRNA positive-strand viruses                 |
| NP_803170 | protein F [Hepatitis C virus]                                    | Flaviviridae; Hepacivirus                                  |
| NP_813797 | 6 kDa protein [Grapevine leafroll-associated virus 3]            | Closteroviridae; Ampelovirus                               |
| NP_813800 | 55 kDa protein [Grapevine leafroll-associated virus 3]           | Closteroviridae; Ampelovirus                               |
| NP_813803 | 21 kDa protein [Grapevine leafroll-associated virus 3]           | Closteroviridae; Ampelovirus                               |
| NP_813804 | 19.6 kDa protein [Grapevine leafroll-associated virus 3]         | Closteroviridae; Ampelovirus                               |
| NP_813805 | 19.7 kDa protein [Grapevine leafroll-associated virus 3]         | Closteroviridae; Ampelovirus                               |
| NP_813807 | 7 kDa protein [Grapevine leafroll-associated virus 3]            | Closteroviridae; Ampelovirus                               |
| NP_828853 | hypothetical protein sars3b [SARS coronavirus]                   | Nidovirales; Coronaviridae; Coronavirus                    |
| NP_828854 | protein E [SARS coronavirus]                                     | Nidovirales; Coronaviridae; Coronavirus                    |
| NP_828856 | hypothetical protein sars6 [SARS coronavirus]                    | Nidovirales; Coronaviridae; Coronavirus                    |
| NP_828857 | hypothetical protein sars7a [SARS coronavirus]                   | Nidovirales; Coronaviridae; Coronavirus                    |
| NP_828859 | hypothetical protein sars9b [SARS coronavirus]                   | Nidovirales; Coronaviridae; Coronavirus                    |
| NP_835246 | p6 protein [Grapevine rootstock stem lesion associated virus]    | Closteroviridae; Closterovirus; unclassified Closterovirus |
| NP_835251 | p19 protein [Grapevine rootstock stem lesion associated virus]   | Closteroviridae; Closterovirus; unclassified Closterovirus |
| NP_835252 | p24 protein [Grapevine rootstock stem lesion associated virus]   | Closteroviridae; Closterovirus; unclassified Closterovirus |
| NP_828852 | hypothetical protein sars3a [SARS coronavirus]                   | Nidovirales; Coronaviridae; Coronavirus                    |
| NP_840018 | P6 protein [Barley yellow dwarf virus - PAV]                     | Luteoviridae; Luteovirus                                   |
| NP_840019 | hypothetical protein [Barley yellow dwarf virus - PAV]           | Luteoviridae; Luteovirus                                   |
| NP_849176 | hypothetical protein sars8a [SARS coronavirus]                   | Nidovirales; Coronaviridae; Coronavirus                    |
| NP_849177 | hypothetical protein sars8b [SARS coronavirus]                   | Nidovirales; Coronaviridae; Coronavirus                    |
| NP_851568 | p5.2 protein [Cucurbit yellow stunting disorder virus]           | Closteroviridae; Crinivirus                                |

|           |                                                                      |                                                            |
|-----------|----------------------------------------------------------------------|------------------------------------------------------------|
| NP_851569 | p25 protein [Cucurbit yellow stunting disorder virus]                | Closteroviridae; Crinivirus                                |
| NP_851570 | p22 protein [Cucurbit yellow stunting disorder virus]                | Closteroviridae; Crinivirus                                |
| NP_851573 | p6 [Cucurbit yellow stunting disorder virus]                         | Closteroviridae; Crinivirus                                |
| NP_851575 | p9 [Cucurbit yellow stunting disorder virus]                         | Closteroviridae; Crinivirus                                |
| NP_862838 | p6 product [Pea stem necrosis virus]                                 | Tombusviridae; Carmovirus                                  |
| NP_891564 | p14 [Little cherry virus 2]                                          | Closteroviridae; Ampelovirus                               |
| NP_891566 | p6 [Little cherry virus 2]                                           | Closteroviridae; Ampelovirus                               |
| NP_891568 | p53 [Little cherry virus 2]                                          | Closteroviridae; Ampelovirus                               |
| NP_891569 | p22 [Little cherry virus 2]                                          | Closteroviridae; Ampelovirus                               |
| NP_891571 | p26 [Little cherry virus 2]                                          | Closteroviridae; Ampelovirus                               |
| NP_891561 | p18 [Little cherry virus 2]                                          | Closteroviridae; Ampelovirus                               |
| NP_919038 | capsid protein [Macrobrachium rosenbergii nodavirus]                 | Nodaviridae; unclassified Nodaviridae                      |
| NP_932308 | 30kDa protein [Botrytis virus X]                                     | unclassified ssRNA positive-strand viruses                 |
| NP_932310 | 14kDa protein [Botrytis virus X]                                     | unclassified ssRNA positive-strand viruses                 |
| NP_932311 | 14kDa protein [Botrytis virus X]                                     | unclassified ssRNA positive-strand viruses                 |
| NP_940786 | ORF 2 [Beet pseudo-yellows virus]                                    | Closteroviridae; Crinivirus                                |
| NP_940787 | p9 [Beet pseudo-yellows virus]                                       | Closteroviridae; Crinivirus                                |
| NP_940789 | p6 [Beet pseudo-yellows virus]                                       | Closteroviridae; Crinivirus                                |
| NP_941375 | hypothetical protein CfMVp1 [Cocksfoot mottle virus]                 | Sobemovirus                                                |
| NP_958174 | triple block protein 3 [Poplar mosaic virus]                         | Flexiviridae; Carlavirus                                   |
| NP_995578 | hypothetical protein SMVAs1p2 [Sclerophthora macrospora virus A]     | unclassified ssRNA positive-strand viruses                 |
| YP_025083 | ORF 2 precursor [Strawberry pallidosis associated virus]             | Closteroviridae; Crinivirus; unclassified Crinivirus       |
| YP_025084 | p8 [Strawberry pallidosis associated virus]                          | Closteroviridae; Crinivirus; unclassified Crinivirus       |
| NP_758812 | 5K protein [Beet black scorch virus]                                 | Tombusviridae; Necrovirus                                  |
| YP_052930 | 6 kDa unknown protein [Pelargonium chlorotic ring pattern virus]     | Tombusviridae; unclassified Tombusviridae                  |
| YP_054410 | triple gene block protein 3 [Opuntia virus X]                        | Flexiviridae; Potexvirus; unclassified Potexvirus          |
| YP_054412 | hypothetical protein [Potato yellow vein virus]                      | Closteroviridae; Crinivirus; unclassified Crinivirus       |
| YP_054416 | putative hydrophobic membrane protein [Potato yellow vein virus]     | Closteroviridae; Crinivirus; unclassified Crinivirus       |
| YP_054418 | hypothetical protein [Potato yellow vein virus]                      | Closteroviridae; Crinivirus; unclassified Crinivirus       |
| YP_077185 | p0 protein [Carrot red leaf virus]                                   | Luteoviridae; unclassified Luteoviridae                    |
| NP_164803 | unknown protein [Fragaria chiloensis latent virus]                   | Bromoviridae; Ilarvirus; Ilarvirus subgroup 6              |
| YP_164806 | ORF 3 [Fragaria chiloensis latent virus]                             | Bromoviridae; Ilarvirus; Ilarvirus subgroup 6              |
| YP_164261 | triple gene block protein 3 [Sweet potato chlorotic fleck virus]     | Flexiviridae; Carlavirus; unclassified Carlavirus          |
| YP_164263 | nucleic acid binding protein [Sweet potato chlorotic fleck virus]    | Flexiviridae; Carlavirus; unclassified Carlavirus          |
| YP_224087 | triple gene block protein [Hydrangea ringspot virus]                 | Flexiviridae; Potexvirus                                   |
| YP_224089 | virally coded protein [Hydrangea ringspot virus]                     | Flexiviridae; Potexvirus                                   |
| YP_224092 | p7 [Mint virus 1]                                                    | Closteroviridae; Closterovirus; unclassified Closterovirus |
| YP_224097 | unknown [Mint virus 1]                                               | Closteroviridae; Closterovirus; unclassified Closterovirus |
| YP_224137 | TGB 3 [Mint virus X]                                                 | Flexiviridae; Potexvirus; unclassified Potexvirus          |
| YP_224220 | hypothetical protein CSDaVgp3 [Citrus sudden death-associated virus] | Tymoviridae; Marafivirus; unclassified Marafivirus         |
| YP_227361 | p6 [Blackberry yellow vein virus]                                    | Closteroviridae; Crinivirus; unclassified Crinivirus       |
| YP_238477 | p13 [Pelargonium line pattern virus]                                 | Tombusviridae; unclassified Tombusviridae                  |
| YP_263306 | triple gene block protein 3 [Lily virus X]                           | Flexiviridae; Potexvirus                                   |
| YP_277432 | 7K protein [Potato virus S]                                          | Flexiviridae; Carlavirus                                   |
| YP_293698 | P4 [Tomato chlorosis virus]                                          | Closteroviridae; Crinivirus                                |
| YP_293700 | P8 [Tomato chlorosis virus]                                          | Closteroviridae; Crinivirus                                |
| YP_293702 | P9 [Tomato chlorosis virus]                                          | Closteroviridae; Crinivirus                                |
| YP_293706 | P7 [Tomato chlorosis virus]                                          | Closteroviridae; Crinivirus                                |
| YP_293696 | P22 [Tomato chlorosis virus]                                         | Closteroviridae; Crinivirus                                |
| YP_293697 | P5 [Tomato chlorosis virus]                                          | Closteroviridae; Crinivirus                                |
| NP_040352 | putative vector transmission protein [Pea early browning virus]      | Tobravirus                                                 |
| NP_040353 | putative vector transmission protein [Pea early browning virus]      | Tobravirus                                                 |
| NP_056787 | hypothetical protein HEVgp09 [Hepatitis E virus]                     | Hepeviridae; Hepevirus                                     |
| NP_040783 | 10K hypothetical protein [Narcissus mosaic virus]                    | Flexiviridae; Potexvirus                                   |
| NP_040832 | 3a protein [Avian infectious bronchitis virus]                       | Nidovirales; Coronaviridae; Coronavirus                    |
| NP_040833 | 3b protein [Avian infectious bronchitis virus]                       | Nidovirales; Coronaviridae; Coronavirus                    |
| NP_040834 | small virion-associated protein [Avian infectious bronchitis virus]  | Nidovirales; Coronaviridae; Coronavirus                    |
| NP_040836 | 5a protein [Avian infectious bronchitis virus]                       | Nidovirales; Coronaviridae; Coronavirus                    |
| NP_040837 | 5b protein [Avian infectious bronchitis virus]                       | Nidovirales; Coronaviridae; Coronavirus                    |
| NP_056756 | 8 kD membrane-bound protein [Potato virus X]                         | Flexiviridae; Potexvirus                                   |
| NP_040991 | 6K triple gene block protein [Foxtail mosaic virus]                  | Flexiviridae; Potexvirus                                   |

|           |                                                                                                                   |                                                          |
|-----------|-------------------------------------------------------------------------------------------------------------------|----------------------------------------------------------|
| NP_041195 | coat protein [Alfalfa mosaic virus]                                                                               | Bromoviridae; Alfamovirus                                |
| NP_041737 | hypothetical protein [Rice yellow mottle virus]                                                                   | Sobemovirus                                              |
| NP_041871 | putative membrane-binding protein [Beet yellows virus]                                                            | Closteroviridae; Closterovirus                           |
| NP_041876 | long-distance transport factor [Beet yellows virus]                                                               | Closteroviridae; Closterovirus                           |
| NP_041877 | RNA silencing suppressor [Beet yellows virus]                                                                     | Closteroviridae; Closterovirus                           |
| NP_041886 | p9 protein [Cardamine chlorotic fleck virus]                                                                      | Tombusviridae; Carmovirus                                |
| NP_042300 | hypothetical protein [Southern cowpea mosaic virus]                                                               | Sobemovirus                                              |
| NP_042305 | coat protein [Pseudomonas phage PP7]                                                                              | Leviviridae; Levivirus; unclassified Levivirus           |
| NP_042306 | lysis protein [Pseudomonas phage PP7]                                                                             | Leviviridae; Levivirus; unclassified Levivirus           |
| NP_042508 | orf1 [Mushroom bacilliform virus]                                                                                 | Barnaviridae; Barnavirus                                 |
| NP_042511 | coat protein [Mushroom bacilliform virus]                                                                         | Barnaviridae; Barnavirus                                 |
| NP_042583 | hypothetical 14k protein [Bamboo mosaic virus]                                                                    | Flexiviridae; Potexvirus                                 |
| NP_042586 | transmembrane protein [Bamboo mosaic virus]                                                                       | Flexiviridae; Potexvirus                                 |
| NP_042862 | 33-kDa protein [Citrus tristeza virus]                                                                            | Closteroviridae; Closterovirus                           |
| NP_042863 | 6-kDa protein [Citrus tristeza virus]                                                                             | Closteroviridae; Closterovirus                           |
| NP_042868 | 18-kDa protein [Citrus tristeza virus]                                                                            | Closteroviridae; Closterovirus                           |
| NP_042869 | 13-kDa protein [Citrus tristeza virus]                                                                            | Closteroviridae; Closterovirus                           |
| NP_043458 | unknown [Lucerne transient streak virus]                                                                          | Sobemovirus                                              |
| NP_043459 | unknown [Lucerne transient streak virus]                                                                          | Sobemovirus                                              |
| NP_054008 | hypothetical protein [Carrot mottle mimic virus]                                                                  | Umbravirus                                               |
| NP_044333 | triple gene block protein 3 [Papaya mosaic virus]                                                                 | Flexiviridae; Potexvirus                                 |
| NP_056829 | unknown1 [Tobacco necrosis virus A]                                                                               | Tombusviridae; Necrovirus                                |
| NP_044385 | unknown1 [Saguaro cactus virus]                                                                                   | Tombusviridae; Carmovirus                                |
| NP_044389 | unknown2 [Saguaro cactus virus]                                                                                   | Tombusviridae; Carmovirus                                |
| NP_054028 | triple gene block 3 [Cymbidium mosaic virus]                                                                      | Flexiviridae; Potexvirus                                 |
| NP_044735 | movement protein [Galinsoga mosaic virus]                                                                         | Tombusviridae; Carmovirus                                |
| NP_044743 | ORF 4 [Leek white stripe virus]                                                                                   | Tombusviridae; Necrovirus                                |
| NP_045003 | hypothetical protein [Little cherry virus 1]                                                                      | Closteroviridae; unclassified Closteroviridae            |
| NP_045008 | hypothetical protein [Little cherry virus 1]                                                                      | Closteroviridae; unclassified Closteroviridae            |
| NP_045009 | hypothetical protein [Little cherry virus 1]                                                                      | Closteroviridae; unclassified Closteroviridae            |
| NP_047284 | 8.4 kDa protein [Rupestris stem pitting-associated virus]                                                         | Flexiviridae; Foveavirus                                 |
| NP_049330 | URF [Black beetle virus]                                                                                          | Nodaviridae; Alphanodavirus                              |
| NP_050005 | ORF 0 [Sugarcane yellow leaf virus]                                                                               | Luteoviridae; Polerovirus                                |
| NP_037580 | ORF1 [Diaporthe ambigua RNA virus 1]                                                                              | unclassified ssRNA positive-strand viruses               |
| NP_037640 | P6 protein [Barley yellow dwarf virus-PAS]                                                                        | Luteoviridae; Luteovirus                                 |
| NP_038456 | movement protein (p8) [Japanese iris necrotic ring virus]                                                         | Tombusviridae; Carmovirus                                |
| NP_057949 | lysis protein [Enterobacteria phage KU1]                                                                          | Leviviridae; Levivirus; Enterobacteria phage BZ13        |
| NP_058425 | non-structural protein 3a [Transmissible gastroenteritis virus]                                                   | Nidovirales; Coronaviridae; Coronavirus; Group 1 species |
| NP_058429 | non-structural protein 7 [Transmissible gastroenteritis virus]                                                    | Nidovirales; Coronaviridae; Coronavirus; Group 1 species |
| NP_059481 | putative coat protein N-terminal extension [Chinese wheat mosaic virus]                                           | Furovirus                                                |
| NP_059939 | unknown [cherry necrotic rusty mottle virus]                                                                      | Flexiviridae; Foveavirus                                 |
| NP_059941 | 7 kDa triple gene block protein [cherry necrotic rusty mottle virus]                                              | Flexiviridae; Foveavirus                                 |
| NP_059943 | unknown [cherry necrotic rusty mottle virus]                                                                      | Flexiviridae; Foveavirus                                 |
| NP_062431 | putative nucleic acid-binding protein [Cherry mottle leaf virus]                                                  | Flexiviridae; Trichovirus                                |
| NP_068345 | p8 [Panicum mosaic virus]                                                                                         | Tombusviridae; Panicovirus                               |
| NP_619721 | p7 protein [Maize chlorotic mottle virus]                                                                         | Tombusviridae; Machlomovirus                             |
| NP_619720 | p31 protein [Maize chlorotic mottle virus]                                                                        | Tombusviridae; Machlomovirus                             |
| NP_619752 | putative replicase [Oat chlorotic stunt virus]                                                                    | Tombusviridae; Avenavirus                                |
| NP_705599 | putative 2A; H-rev107 homolog; putative regulator of cell proliferation [Avian encephalomyelitis virus]           | Picornaviridae; Hepatovirus; unclassified Hepatovirus    |
| NP_705600 | putative 2B; membrane-associated protein [Avian encephalomyelitis virus]                                          | Picornaviridae; Hepatovirus; unclassified Hepatovirus    |
| NP_705602 | putative 3A; membrane-associated protein [Avian encephalomyelitis virus]                                          | Picornaviridae; Hepatovirus; unclassified Hepatovirus    |
| NP_705583 | nsp1 (PCP1b); papain-like cysteine proteinase 1b preceded by non-functional PCP1a domain [Equine arteritis virus] | Nidovirales; Arteriviridae; Arterivirus                  |
| NP_705589 | nsp7 [Equine arteritis virus]                                                                                     | Nidovirales; Arteriviridae; Arterivirus                  |
| NP_705593 | nsp12 [Equine arteritis virus]                                                                                    | Nidovirales; Arteriviridae; Arterivirus                  |
| NP_705594 | nsp8 [Equine arteritis virus]                                                                                     | Nidovirales; Arteriviridae; Arterivirus                  |
| NP_705881 | 3A [Ljungan virus]                                                                                                | Picornaviridae; Parechovirus                             |
| NP_705882 | 3B; VPg [Ljungan virus]                                                                                           | Picornaviridae; Parechovirus                             |
| NP_714937 | putative 3B [Simian enterovirus A]                                                                                | Picornaviridae; Enterovirus                              |
| NP_733948 | papain-like protease [Beet yellows virus]                                                                         | Closteroviridae; Closterovirus                           |
| NP_734238 | 6K2 protein [Papaya ringspot virus]                                                                               | Potyviridae; Potyvirus                                   |
| NP_734332 | 6K2 protein [Tobacco vein mottling virus]                                                                         | Potyviridae; Potyvirus                                   |

|           |                                                                                                  |                                                           |
|-----------|--------------------------------------------------------------------------------------------------|-----------------------------------------------------------|
| NP_734218 | 6K2 protein [Turnip mosaic virus]                                                                | Potyviridae; Potyvirus                                    |
| NP_734073 | Hypothetical protein [Bean pod mottle virus]                                                     | Comoviridae; Comovirus                                    |
| NP_734005 | VPg [Tomato ringspot virus]                                                                      | Comoviridae; Nepovirus; Subgroup C                        |
| NP_734296 | 6k2 protein [Barley mild mosaic virus]                                                           | Potyviridae; Bymovirus                                    |
| NP_734443 | hypothetical protein [Parsnip yellow fleck virus]                                                | Sequiviridae; Sequivirus                                  |
| NP_734444 | 22.5 kDa coat protein [Parsnip yellow fleck virus]                                               | Sequiviridae; Sequivirus                                  |
| NP_734446 | 31 kDa coat protein [Parsnip yellow fleck virus]                                                 | Sequiviridae; Sequivirus                                  |
| NP_734449 | 3C-like protease [Parsnip yellow fleck virus]                                                    | Sequiviridae; Sequivirus                                  |
| NP_734403 | 6K2 protein [Johnsongrass mosaic virus]                                                          | Potyviridae; Potyvirus                                    |
| NP_736601 | VPg [Rice yellow mottle virus]                                                                   | Sobemovirus                                               |
| NP_734286 | 6K1 protein [Sweet potato mild mottle virus]                                                     | Potyviridae; Ipomovirus                                   |
| NP_734289 | 6K2 protein [Sweet potato mild mottle virus]                                                     | Potyviridae; Ipomovirus                                   |
| NP_733976 | movement protein [Satsuma dwarf virus]                                                           | Sadwavirus                                                |
| NP_733978 | small capsid protein [Satsuma dwarf virus]                                                       | Sadwavirus                                                |
| NP_734024 | cysteine protease [Satsuma dwarf virus]                                                          | Sadwavirus                                                |
| NP_734043 | VPg [Blackcurrant reversion virus]                                                               | Comoviridae; Nepovirus; Subgroup C                        |
| NP_734020 | VPg [Apple latent spherical virus]                                                               | Cheravirus                                                |
| NP_736586 | VPg [Ryegrass mottle virus]                                                                      | Sobemovirus                                               |
| NP_734440 | P2 protein [Oat mosaic virus]                                                                    | Potyviridae; Bymovirus                                    |
| NP_733952 | VPg [Strawberry mottle virus]                                                                    | Sadwavirus                                                |
| NP_733953 | protease [Strawberry mottle virus]                                                               | Sadwavirus                                                |
| NP_733983 | movement protein [Strawberry mottle virus]                                                       | Sadwavirus                                                |
| NP_733985 | small capsid protein [Strawberry mottle virus]                                                   | Sadwavirus                                                |
| NP_734394 | 6K2 protein [Cocksfoot streak virus]                                                             | Potyviridae; Potyvirus                                    |
| NP_740662 | capsid protein (C) [Rubella virus]                                                               | Togaviridae; Rubivirus                                    |
| NP_740663 | glycoprotein E2 [Rubella virus]                                                                  | Togaviridae; Rubivirus                                    |
| NP_740664 | glycoprotein E1 [Rubella virus]                                                                  | Togaviridae; Rubivirus                                    |
| NP_740621 | coronavirus nsp8 [Avian infectious bronchitis virus]                                             | Nidovirales; Coronaviridae; Coronavirus                   |
| NP_740634 | leader protein p87 [Avian infectious bronchitis virus]                                           | Nidovirales; Coronaviridae; Coronavirus                   |
| NP_740453 | VPg(3B) [Bovine enterovirus]                                                                     | Picornaviridae; Enterovirus                               |
| NP_740553 | 2A mature peptide [Hepatitis A virus]                                                            | Picornaviridae; Hepatovirus                               |
| NP_740554 | 2B mature peptide [Hepatitis A virus]                                                            | Picornaviridae; Hepatovirus                               |
| NP_740556 | 3A mature peptide [Hepatitis A virus]                                                            | Picornaviridae; Hepatovirus                               |
| NP_740557 | 3B (VPg) mature peptide [Hepatitis A virus]                                                      | Picornaviridae; Hepatovirus                               |
| NP_740406 | protein 2A [Encephalomyocarditis virus]                                                          | Picornaviridae; Cardiovirus                               |
| NP_740510 | VPg1 protein [Foot-and-mouth disease virus C]                                                    | Picornaviridae; Aphthovirus; Foot-and-mouth disease virus |
| NP_740398 | P-3A polypeptide [Human rhinovirus A]                                                            | Picornaviridae; Rhinovirus                                |
| NP_740594 | nsp8 [Porcine reproductive and respiratory syndrome virus]                                       | Nidovirales; Arteriviridae; Arterivirus                   |
| NP_740605 | nsp12 [Porcine reproductive and respiratory syndrome virus]                                      | Nidovirales; Arteriviridae; Arterivirus                   |
| NP_740380 | 3A [Equine rhinitis A virus]                                                                     | Picornaviridae; Aphthovirus                               |
| NP_740381 | 3B (VPg) [Equine rhinitis A virus]                                                               | Picornaviridae; Aphthovirus                               |
| NP_740348 | L protein [Porcine teschovirus]                                                                  | Picornaviridae; Teschovirus                               |
| NP_740349 | VP4 protein [Porcine teschovirus]                                                                | Picornaviridae; Teschovirus                               |
| NP_740354 | 2B protein [Porcine teschovirus]                                                                 | Picornaviridae; Teschovirus                               |
| NP_740356 | 3A protein [Porcine teschovirus]                                                                 | Picornaviridae; Teschovirus                               |
| NP_740357 | 3B protein [Porcine teschovirus]                                                                 | Picornaviridae; Teschovirus                               |
| NP_740719 | mature capsid protein gamma [Pariacoto virus]                                                    | Nodaviridae; Alphanodavirus                               |
| NP_740545 | 3B(VPg) [Human enterovirus B]                                                                    | Picornaviridae; Enterovirus                               |
| NP_740591 | VPg (3B) protein [Human enterovirus C]                                                           | Picornaviridae; Enterovirus                               |
| NP_740475 | genome linked protein VPg [Poliovirus]                                                           | Picornaviridae; Enterovirus                               |
| NP_740523 | 3B (VPg) [Human rhinovirus B]                                                                    | Picornaviridae; Rhinovirus                                |
| NP_740423 | leader peptide [Theilovirus]                                                                     | Picornaviridae; Cardiovirus                               |
| NP_740428 | protein 2A [Theilovirus]                                                                         | Picornaviridae; Cardiovirus                               |
| NP_740735 | VPg protein 3B [Human parechovirus]                                                              | Picornaviridae; Parechovirus                              |
| NP_740745 | VPg 3B [Human enterovirus D]                                                                     | Picornaviridae; Enterovirus                               |
| NP_751900 | VP29 precursor [Human astrovirus]                                                                | Astroviridae; Mamastrovirus                               |
| NP_751901 | VP26 precursor [Human astrovirus]                                                                | Astroviridae; Mamastrovirus                               |
| NP_751902 | NSMP-1, non-structural mature protein 1; N-terminal orf1ab cleavage product [Human astrovirus]   | Astroviridae; Mamastrovirus                               |
| NP_751904 | NSMP-4, non-structural mature protein 4; C-terminal part of the orf1a product [Human astrovirus] | Astroviridae; Mamastrovirus                               |
| NP_751919 | core protein; p21c [Hepatitis C virus]                                                           | Flaviviridae; Hepacivirus                                 |
| NP_751921 | E2 protein; viral envelope protein [Hepatitis C virus]                                           | Flaviviridae; Hepacivirus                                 |
| NP_751922 | p7 protein [Hepatitis C virus]                                                                   | Flaviviridae; Hepacivirus                                 |
| NP_751925 | NS4A protein [Hepatitis C virus]                                                                 | Flaviviridae; Hepacivirus                                 |

|              |                                                                     |                                                               |
|--------------|---------------------------------------------------------------------|---------------------------------------------------------------|
| NP_757347    | papain-like protease 1 [Citrus tristeza virus]                      | Closteroviridae; Closterovirus                                |
| NP_757348    | papain-like protease 2 [Citrus tristeza virus]                      | Closteroviridae; Closterovirus                                |
| NP_757354    | putative E2 protein [Hepatitis GB virus B]                          | Flaviviridae; unclassified Flaviviridae                       |
| NP_757355    | putative protein p7 [Hepatitis GB virus B]                          | Flaviviridae; unclassified Flaviviridae                       |
| NP_757356    | putative NS2 protein [Hepatitis GB virus B]                         | Flaviviridae; unclassified Flaviviridae                       |
| NP_757358    | putative NS4A protein [Hepatitis GB virus B]                        | Flaviviridae; unclassified Flaviviridae                       |
| NP_758445    | VPg genome-linked peptide [Sugarcane yellow leaf virus]             | Luteoviridae; Polerovirus                                     |
| NP_758538    | 3B (VPg) [Porcine enterovirus B]                                    | Picornaviridae; Enterovirus                                   |
| NP_776023    | putative core protein C [Tamana bat virus]                          | Flaviviridae; Flavivirus; unclassified Flavivirus             |
| NP_776024    | putative anchored core protein C [Tamana bat virus]                 | Flaviviridae; Flavivirus; unclassified Flavivirus             |
| NP_776025    | putative preM protein [Tamana bat virus]                            | Flaviviridae; Flavivirus; unclassified Flavivirus             |
| NP_776026    | putative matrix protein M [Tamana bat virus]                        | Flaviviridae; Flavivirus; unclassified Flavivirus             |
| NP_776028    | putative non-structural protein NS1 [Tamana bat virus]              | Flaviviridae; Flavivirus; unclassified Flavivirus             |
| NP_776029    | putative non-structural protein NS2a [Tamana bat virus]             | Flaviviridae; Flavivirus; unclassified Flavivirus             |
| NP_776030    | putative non-structural protein NS2b [Tamana bat virus]             | Flaviviridae; Flavivirus; unclassified Flavivirus             |
| NP_776032    | putative non-structural protein NS4a [Tamana bat virus]             | Flaviviridae; Flavivirus; unclassified Flavivirus             |
| NP_776033    | putative 2K protein [Tamana bat virus]                              | Flaviviridae; Flavivirus; unclassified Flavivirus             |
| NP_776034    | putative non-structural protein NS4b [Tamana bat virus]             | Flaviviridae; Flavivirus; unclassified Flavivirus             |
| NP_776036    | putative core protein C [Cell fusing agent virus]                   | Flaviviridae; Flavivirus; unclassified Flavivirus             |
| NP_776037    | putative anchored core protein C [Cell fusing agent virus]          | Flaviviridae; Flavivirus; unclassified Flavivirus             |
| NP_783303    | p5.6 [Feline calicivirus]                                           | Caliciviridae; Vesivirus                                      |
| NP_786904    | putative N-terminal leader protein [Canine calicivirus]             | Caliciviridae; unclassified Caliciviridae                     |
| NP_803214    | putative NS4A protein [Hepatitis GB virus A]                        | Flaviviridae; unclassified Flaviviridae                       |
| NP_803427    | p150 [Rubella virus]                                                | Togaviridae; Rubivirus                                        |
| NP_828860    | nsp1-pp1a/pp1ab [SARS coronavirus]                                  | Nidovirales; Coronaviridae; Coronavirus                       |
| NP_828861    | nsp2-pp1a/pp1ab [SARS coronavirus]                                  | Nidovirales; Coronaviridae; Coronavirus                       |
| NP_937771    | capsid protein [Kamiti River virus]                                 | Flaviviridae; Flavivirus; unclassified Flavivirus             |
| NP_937772    | membrane protein [Kamiti River virus]                               | Flaviviridae; Flavivirus; unclassified Flavivirus             |
| NP_937968    | leader [Simian picornavirus 1]                                      | Picornaviridae; unclassified Picornaviridae                   |
| NP_937981    | small capsid protein [Euprosterina elaeasa virus]                   | Tetraviridae; Betatetravirus                                  |
| NP_937982    | small putative peptide [Euprosterina elaeasa virus]                 | Tetraviridae; Betatetravirus                                  |
| NP_942000    | VPg [Turnip rosette virus]                                          | Sobemovirus                                                   |
| NP_942019    | VPg [Cocksfoot mottle virus]                                        | Sobemovirus                                                   |
| NP_945126    | p12 protein [Pelargonium flower break virus]                        | Tombusviridae; Carmovirus                                     |
| NP_951028    | genome-linked protein [Broad bean wilt virus 1]                     | Comoviridae; Fabavirus                                        |
| NP_982340    | 6 kDa protein 2 [Chilli vein mottle virus]                          | Potyviridae; Potyvirus                                        |
| YP_053926    | hypothetical peptide [Tobacco ringspot virus]                       | Comoviridae; Nepovirus; Subgroup A                            |
| NP_734015    | VPg [Cycas necrotic stunt virus]                                    | Comoviridae; Nepovirus; Subgroup B                            |
| YP_054441    | VPg [Arabis mosaic virus]                                           | Comoviridae; Nepovirus; Subgroup A                            |
| NP_734036    | VPg [Grapevine fanleaf virus]                                       | Comoviridae; Nepovirus; Subgroup A                            |
| YP_081452    | genome-linked viral protein [Cherry rasp leaf virus]                | Cheravirus                                                    |
| NP_001006603 | nonstructural protein 2K [Langat virus]                             | Flaviviridae; Flavivirus; tick-borne encephalitis virus group |
| YP_164820    | leader [Duck picornavirus TW90A]                                    | Picornaviridae; unclassified Picornaviridae                   |
| YP_227369    | protease cofactor [Strawberry latent ringspot virus]                | Sadwavirus                                                    |
| YP_227372    | protease [Strawberry latent ringspot virus]                         | Sadwavirus                                                    |
| YP_227368    | 109 kDa polyprotein [Strawberry latent ringspot virus]              | Sadwavirus                                                    |
| YP_227374    | putative 40 kDa movement protein [Strawberry latent ringspot virus] | Sadwavirus                                                    |
| YP_227375    | large coat protein [Strawberry latent ringspot virus]               | Sadwavirus                                                    |
| YP_227376    | small coat protein [Strawberry latent ringspot virus]               | Sadwavirus                                                    |
| YP_238480    | p6 [Pelargonium line pattern virus]                                 | Tombusviridae; unclassified Tombusviridae                     |
| YP_308880    | 6K1 protein [Cucumber vein yellowing virus]                         | Potyviridae; unclassified Potyviridae                         |
| YP_308882    | 6K2 protein [Cucumber vein yellowing virus]                         | Potyviridae; unclassified Potyviridae                         |
| NP_056781    | Y domain [Hepatitis E virus]                                        | Hepeviridae; Hepevirus                                        |
| NP_056782    | papain-like protease [Hepatitis E virus]                            | Hepeviridae; Hepevirus                                        |
| NP_056783    | poly-proline hinge [Hepatitis E virus]                              | Hepeviridae; Hepevirus                                        |
| NP_038457    | movement protein (p12) [Japanese iris necrotic ring virus]          | Tombusviridae; Carmovirus                                     |
| NP_062884    | structural polyprotein precursor [Rubella virus]                    | Togaviridae; Rubivirus                                        |

1

2

1 **Supplementary Table S2: Taxonomic distribution of proteins for which at least one**  
2 **method finds homologs in more than one genus**

3 For each sequence similarity search program, the taxonomic distribution of homologs is  
4 presented as follows: species/genus/family level. For instance, in the first row, in column Psi-  
5 Blast, 706/55/18 means that Psi-blast finds homologs of the query protein in 706 species, 55  
6 genera, and 18 families.

7 The last column indicates the PFAM families or clans (groupings of homologous families)  
8 detected by HHpred as being homologous to the query, separated by semi-columns. If a PFAM  
9 family is part of a clan, that clan is indicated between brackets.

10 “?” means that there was no information available regarding the taxonomical distribution of hits.  
11 Reasons include the fact that no viral homolog was found (for HHpred), or that the taxonomic  
12 assignment is incomplete.

| Accession | HHpred      | HHblits | PSIBLAST  | BLAST  | Pfam (fam1 [clan1]; fam2 [clan2])                                                                                                                                                                                                      |
|-----------|-------------|---------|-----------|--------|----------------------------------------------------------------------------------------------------------------------------------------------------------------------------------------------------------------------------------------|
| NP_573541 | 1579/151/47 | 4/1/1   | 706/55/18 | 4/1/1  | Birna_RdRp; RdRP_1 [RdRP]                                                                                                                                                                                                              |
| NP_803427 | 551/66/22   | 93/13/7 | 42/5/4    | 1/1/1  | Peptidase_C27 [Peptidase_CA]; Macro [MACRO]; Rubi_NSP_C                                                                                                                                                                                |
| NP_705599 | 516/64/22   | 34/6/4  | 1/1/1     | 1/1/1  | LRAT [Peptidase_CA]; Calici_PP_N; NLPC_P60 [Peptidase_CA];<br>DUF830 [Peptidase_CA]; DUF778                                                                                                                                            |
| NP_786945 | 516/64/22   | 23/5/3  | 5/3/1     | 3/2/1  | Calici_PP_N; LRAT [Peptidase_CA]; NLPC_P60 [Peptidase_CA];<br>DUF830 [Peptidase_CA]; DUF778                                                                                                                                            |
| NP_056788 | 654/72/21   | 61/3/2  | 154/11/3  | 11/2/2 | SP2 [Viral_ssRNA_CP]; Astro_capsid; Viral_coat [Viral_ssRNA_CP]                                                                                                                                                                        |
| NP_757347 | 511/61/21   | 8/1/1   | 8/1/1     | 2/1/1  | DUF3648; DUF3762; Peptidase_C42 [Peptidase_CA]                                                                                                                                                                                         |
| NP_757348 | 511/61/21   | 8/1/1   | 8/1/1     | 1/1/1  | DUF3614; Peptidase_C42 [Peptidase_CA]                                                                                                                                                                                                  |
| NP_733948 | 511/61/21   | 8/1/1   | 6/1/1     | 2/1/1  | Peptidase_C42 [Peptidase_CA]; DUF3614                                                                                                                                                                                                  |
| NP_740719 | 608/71/20   | 7/1/1   | 1/1/1     | 1/1/1  | Peptidase_A6 [Viral_ssRNA_CP]                                                                                                                                                                                                          |
| NP_937981 | 608/71/20   | 2/1/1   | 2/1/1     | 2/1/1  | Peptidase_A21 [Viral_ssRNA_CP]                                                                                                                                                                                                         |
| NP_919038 | 608/71/20   | 2/?/1   | 2/?/1     | 2/?/1  | Viral_coat [Viral_ssRNA_CP]                                                                                                                                                                                                            |
| NP_786949 | 395/57/20   | 20/6/1  | 4/3/1     | 3/2/1  | Peptidase_C37 [Peptidase_PA]; Peptidase_C24 [Peptidase_PA];<br>Peptidase_C3 [Peptidase_PA]; Trypsin_2 [Peptidase_PA]; Peptidase_S32<br>[Peptidase_PA]                                                                                  |
| NP_786948 | 395/57/20   | 20/6/1  | 3/2/1     | 3/2/1  | Peptidase_C37 [Peptidase_PA]                                                                                                                                                                                                           |
| NP_751904 | 395/57/20   | 22/2/1  | 10/1/1    | 10/1/1 | DUF3621; Peptidase_C37 [Peptidase_PA]                                                                                                                                                                                                  |
| NP_786947 | 395/57/20   | 3/2/1   | 3/2/1     | 3/2/1  | Peptidase_C37 [Peptidase_PA]                                                                                                                                                                                                           |
| NP_733953 | 395/57/20   | 2/?/1   | 2/?/1     | 2/?/1  | Peptidase_C3 [Peptidase_PA]                                                                                                                                                                                                            |
| YP_164806 | 341/43/15   | 29/9/7  | 1/1/1     | 1/1/1  | OrfB_Zn_ribbon [Zn_Beta_Ribbon]; zf-NADH-PPase [Zn_Beta_Ribbon];<br>FYDLN_acid; UPF0547 [Zn_Beta_Ribbon]; DUF1610<br>[Zn_Beta_Ribbon]; TF_Zn_Ribbon [Zn_Beta_Ribbon];<br>PhnA_Zn_Ribbon [Zn_Beta_Ribbon]; zf-ribbon_3 [Zn_Beta_Ribbon] |
| NP_689397 | 66/22/13    | 60/18/8 | 43/11/6   | 1/1/1  | Ribonuclease_3; dsrm [DSRM]                                                                                                                                                                                                            |
| NP_056781 | 260/40/12   | 2/1/1   | 2/1/1     | 2/1/1  | Vmethyltransf                                                                                                                                                                                                                          |
| NP_624334 | 94/16/6     | 1/1/1   | 1/1/1     | 1/1/1  | MP                                                                                                                                                                                                                                     |
| NP_734440 | 54/9/3      | 4/1/1   | 3/1/1     | 1/1/1  | TMV_coat                                                                                                                                                                                                                               |
| NP_813800 | 62/8/3      | 39/3/1  | 42/3/1    | 7/1/1  | Viral_Hsp90; Closter_coat; Tricho_coat                                                                                                                                                                                                 |
| NP_891568 | 62/8/3      | 39/3/1  | 42/3/1    | 2/1/1  | Viral_Hsp90; Closter_coat; Tricho_coat                                                                                                                                                                                                 |
| YP_164263 | 57/6/3      | 57/6/3  | 56/6/3    | 2/1/1  | Viral_NABP [Viral_NABP]; Carla_C4 [Viral_NABP]; CTV_P23<br>[Viral_NABP]                                                                                                                                                                |
| NP_203558 | 57/6/3      | 56/5/2  | 1/1/1     | 1/1/1  | Viral_NABP [Viral_NABP]; Carla_C4 [Viral_NABP]                                                                                                                                                                                         |
| NP_062431 | 57/6/3      | 55/4/2  | 2/1/1     | 2/1/1  | Viral_NABP [Viral_NABP]; Carla_C4 [Viral_NABP]                                                                                                                                                                                         |
| NP_619666 | 57/6/3      | 4/1/1   | 6/1/1     | 3/1/1  | Viral_NABP [Viral_NABP]                                                                                                                                                                                                                |
| YP_263306 | 87/5/2      | 80/5/2  | 51/3/2    | 1/1/1  | 7kD_coat                                                                                                                                                                                                                               |
| NP_059941 | 87/5/2      | 78/5/2  | 2/?/1     | 2/?/1  | 7kD_coat                                                                                                                                                                                                                               |
| NP_619562 | 87/5/2      | 77/5/2  | 47/3/2    | 1/1/1  | 7kD_coat                                                                                                                                                                                                                               |

|           |        |        |        |        |                           |
|-----------|--------|--------|--------|--------|---------------------------|
| YP_277432 | 87/5/2 | 77/5/2 | 46/3/2 | 2/1/1  | 7kD_coat                  |
| NP_056756 | 87/5/2 | 76/5/2 | 43/3/2 | 1/1/1  | 7kD_coat                  |
| YP_054410 | 87/5/2 | 76/5/2 | 4/1/1  | 1/1/1  | 7kD_coat                  |
| NP_077082 | 87/5/2 | 76/5/2 | 3/1/1  | 3/1/1  | 7kD_coat                  |
| NP_112032 | 87/5/2 | 75/5/2 | 4/?/1  | 1/?/1  | 7kD_coat                  |
| NP_203556 | 87/5/2 | 74/5/2 | 1/1/1  | 1/1/1  | 7kD_coat                  |
| NP_620718 | 87/5/2 | 74/5/2 | 1/1/1  | 1/1/1  | 7kD_coat                  |
| YP_224137 | 87/5/2 | 71/5/2 | 1/1/1  | 1/1/1  | 7kD_coat                  |
| NP_624316 | 87/5/2 | 69/5/2 | 1/?/1  | 1/?/1  | 7kD_coat                  |
| NP_958174 | 87/5/2 | 75/4/2 | 49/4/2 | 8/1/1  | 7kD_coat                  |
| NP_663727 | 87/5/2 | 75/4/2 | 8/1/1  | 2/1/1  | 7kD_coat                  |
| YP_224087 | 87/5/2 | 75/4/2 | 1/1/1  | 1/1/1  | 7kD_coat                  |
| NP_604467 | 87/5/2 | 71/4/2 | 47/3/2 | 8/2/1  | 7kD_coat                  |
| NP_054028 | 87/5/2 | 71/4/2 | 8/1/1  | 1/1/1  | 7kD_coat                  |
| NP_620839 | 87/5/2 | 70/3/2 | 1/1/1  | 1/1/1  | 7kD_coat                  |
| NP_702991 | 87/5/2 | 70/3/2 | 1/1/1  | 1/1/1  | 7kD_coat                  |
| NP_044333 | 87/5/2 | 68/3/2 | 1/1/1  | 1/1/1  | 7kD_coat                  |
| YP_164261 | 87/5/2 | 60/3/2 | 1/1/1  | 1/1/1  | 7kD_coat                  |
| NP_040991 | 87/5/2 | 2/1/1  | 1/1/1  | 1/1/1  | 7kD_coat                  |
| NP_042586 | 87/5/2 | 2/1/1  | 1/1/1  | 1/1/1  | 7kD_coat                  |
| NP_619749 | 87/5/2 | 1/1/1  | 1/1/1  | 1/1/1  | 7kD_coat                  |
| NP_620645 | 87/5/2 | 1/1/1  | 1/1/1  | 1/1/1  | 7kD_coat                  |
| NP_047284 | 87/5/2 | 1/1/1  | 1/1/1  | 1/1/1  | 7kD_coat                  |
| NP_068550 | 19/5/2 | 1/1/1  | 1/1/1  | 1/1/1  | Tricho_coat               |
| NP_751901 | 48/3/2 | 46/2/2 | 68/2/1 | 14/1/1 | Astro_capsid              |
| NP_751900 | 48/3/2 | 11/2/2 | 34/1/1 | 5/1/1  | Astro_capsid              |
| NP_734238 | 97/7/1 | 81/2/1 | 87/2/1 | 3/1/1  | Poty_PP                   |
| NP_734218 | 97/7/1 | 81/2/1 | 85/2/1 | 4/1/1  | Poty_PP                   |
| NP_734332 | 97/7/1 | 81/2/1 | 85/2/1 | 1/1/1  | Poty_PP                   |
| NP_734403 | 97/7/1 | 81/2/1 | 2/1/1  | 1/1/1  | Poty_PP                   |
| NP_734394 | 97/7/1 | 81/2/1 | 1/1/1  | 1/1/1  | Poty_PP                   |
| NP_982340 | 97/7/1 | 80/2/1 | 87/2/1 | 4/1/1  | Poty_PP                   |
| NP_740349 | 12/6/1 | 12/6/1 | 1/1/1  | 1/1/1  | VP4_2                     |
| NP_734286 | 81/5/1 | 1/1/1  | 5/1/1  | 1/1/1  | Potyvirid-P3              |
| NP_068344 | 22/4/1 | 4/3/1  | 2/2/1  | 2/2/1  | MNSV_P7B; Tombus_movement |
| NP_068345 | 22/4/1 | 2/2/1  | 1/1/1  | 1/1/1  | Tombus_movement           |
| NP_620722 | 22/4/1 | 17/1/1 | 2/1/1  | 1/1/1  | Tombus_movement           |
| NP_613269 | 22/4/1 | 16/1/1 | 2/1/1  | 2/1/1  | Tombus_movement           |
| NP_619674 | 22/4/1 | 16/1/1 | 1/1/1  | 1/1/1  | Tombus_movement           |
| NP_038456 | 22/4/1 | 1/1/1  | 1/1/1  | 1/1/1  | Tombus_movement           |
| YP_077185 | 17/3/1 | 17/3/1 | 18/3/1 | 1/1/1  | Luteo_PO                  |
| NP_114360 | 17/3/1 | 17/3/1 | 11/1/1 | 2/1/1  | Luteo_PO                  |
| NP_604482 | 11/3/1 | 11/3/1 | 5/2/1  | 1/1/1  | Viral_P18                 |
| NP_056822 | 7/3/1  | 6/3/1  | 5/2/1  | 5/2/1  | RNA_capsid                |
| NP_828854 | 33/2/1 | 33/2/1 | 3/1/1  | 3/1/1  | NS3_envE                  |
| NP_041195 | 20/2/1 | 1/1/1  | 1/1/1  | 1/1/1  | llar_coat                 |
| NP_740398 | 19/2/1 | 24/2/1 | 24/2/1 | 15/1/1 | P3A                       |
| NP_740486 | 19/2/1 | 24/2/1 | 2/2/1  | 2/2/1  | P3A                       |
| NP_054008 | 6/2/1  | 7/2/1  | 8/2/1  | 2/1/?  | Umbravirus_LDM            |
| YP_077279 | 2/2/1  | 2/2/1  | 2/2/1  | 2/2/1  | DUF1478                   |
| NP_828861 | 6/1/1  | 24/2/1 | 25/2/1 | 7/1/1  | DUF3477                   |
| NP_862838 | 3/1/1  | 20/3/1 | 2/1/1  | 1/1/1  | MNSV_P7B                  |
| NP_044735 | 3/1/1  | 18/3/1 | 1/1/1  | 1/1/1  | MNSV_P7B                  |
| NP_705881 | 2/1/1  | 3/2/1  | 2/1/1  | 1/1/1  | Picornia_P3A              |
| NP_740423 | 1/1/1  | 9/5/1  | 1/1/1  | 1/1/1  | VP_N-CPKC                 |
| NP_705882 | 1/1/1  | 3/2/1  | 1/1/1  | 1/1/1  | Parecho_VpG               |
| NP_740735 | 1/1/1  | 3/2/1  | 1/1/1  | 1/1/1  | Parecho_VpG               |
| NP_740553 | 1/1/1  | 2/2/1  | 1/1/1  | 1/1/1  | DUF3840                   |
| NP_740406 | ?/?/?  | 9/5/1  | 2/1/1  | 1/1/1  |                           |
| NP_740428 | ?/?/?  | 9/5/1  | 2/1/1  | 1/1/1  |                           |
| NP_740545 | ?/?/?  | 23/2/1 | 9/1/1  | 3/1/1  |                           |
| NP_740591 | ?/?/?  | 23/2/1 | 5/1/1  | 1/1/1  |                           |
| NP_740745 | ?/?/?  | 23/2/1 | 5/1/1  | 1/1/1  |                           |
| NP_740475 | ?/?/?  | 23/2/1 | 3/1/1  | 1/1/1  |                           |
| NP_758538 | ?/?/?  | 23/2/1 | 1/1/1  | 1/1/1  |                           |
| NP_937968 | ?/?/?  | 21/2/1 | 1/1/1  | 1/1/1  |                           |



|           |     |       |       |       |
|-----------|-----|-------|-------|-------|
| NP_068347 | ??? | 2/2/1 | 2/2/1 | 2/2/1 |
| NP_705602 | ??? | 2/2/1 | 1/1/1 | 1/1/1 |
| NP_740554 | ??? | 2/2/1 | 1/1/1 | 1/1/1 |
| NP_740556 | ??? | 2/2/1 | 1/1/1 | 1/1/1 |

1
